# Supplementary material for: China's environment in a globalizing world
Source: Springer Nature journal article supplement (doi:10.1038/4351179a), 2005-06-29
Supplement: 41586_2005_BF4351179a_MOESM6_ESM.pdf [file 41586_2005_BF4351179a_MOESM6_ESM.pdf]

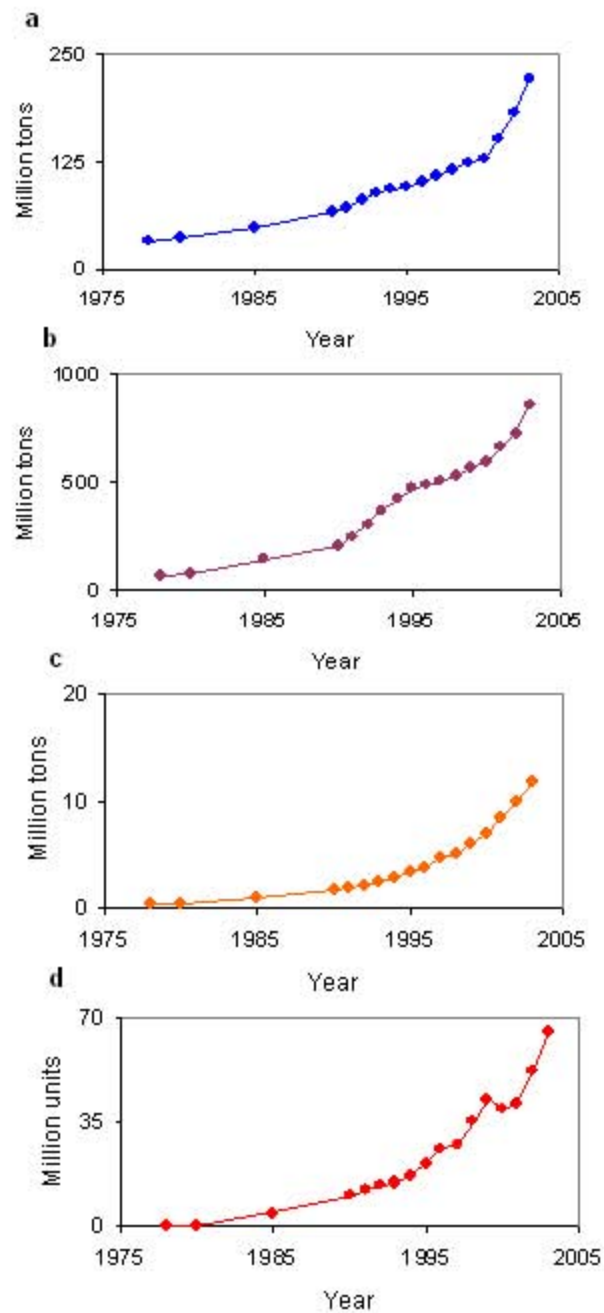

Supplementary Figure 5. Growth of (a) steel, (b) cement, (c) chemical fiber, and (d) color television sets.
