# Supplementary material for: China's environment in a globalizing world
Source: Springer Nature journal article supplement (doi:10.1038/4351179a), 2005-06-29
Supplement: 41586_2005_BF4351179a_MOESM13_ESM.pdf [file 41586_2005_BF4351179a_MOESM13_ESM.pdf]

## Liu and Diamond: China's Environment in a Globalizing World

**Supplementary Table Additional information about population, economy, and environmental conditions of China and 14 other major countries**

| Country      | Area<br>(10,000<br>km <sup>2</sup> ,<br>2002) | Population<br>density<br>(people/km <sup>2</sup> ,<br>2003) | Urban<br>Population<br>(%, 2003) | Fertility<br>rate<br>(births<br>per<br>woman,<br>2003) | GDP<br>per<br>capita<br>(US\$,<br>2003) | GDP<br>(current<br>US\$<br>billions,<br>2003) | Annual<br>change in<br>household<br>size<br>(%, 1985-<br>2000) | Foreign<br>direct<br>Investment<br>US\$<br>billions,<br>2002) | Energy<br>use (kg of<br>oil<br>equivalent<br>per<br>capita,<br>2001) | Forested<br>land area<br>(%,<br>2000) | NO <sub>x</sub> per<br>populated<br>area<br>(thousand<br>metric<br>tons/km <sup>2</sup> ,<br>2000) |
|--------------|-----------------------------------------------|-------------------------------------------------------------|----------------------------------|--------------------------------------------------------|-----------------------------------------|-----------------------------------------------|----------------------------------------------------------------|---------------------------------------------------------------|----------------------------------------------------------------------|---------------------------------------|----------------------------------------------------------------------------------------------------|
| <b>China</b> | <b>960</b>                                    | <b>134</b>                                                  | <b>39</b>                        | <b>1.9</b>                                             | <b>1,094</b>                            | <b>1,410</b>                                  | <b>-1.5</b>                                                    | <b>49</b>                                                     | <b>900</b>                                                           | <b>18</b>                             | <b>0.8</b>                                                                                         |
| Bangladesh   | 14                                            | 959                                                         | 24                               | 3.0                                                    | 376                                     | 52                                            | -0.7                                                           | 0                                                             | 150                                                                  | 10                                    | 0.7                                                                                                |
| Brazil       | 845                                           | 21                                                          | 83                               | 2.1                                                    | 2,788                                   | 492                                           | -1.1                                                           | 17                                                            | 1,070                                                                | 64                                    | 0.3                                                                                                |
| India        | 328                                           | 324                                                         | 28                               | 2.9                                                    | 563                                     | 599                                           | -0.4                                                           | 3                                                             | 520                                                                  | 22                                    | 0.5                                                                                                |
| Indonesia    | 190                                           | 113                                                         | 46                               | 2.3                                                    | 971                                     | 208                                           | -1.0                                                           | -2                                                            | 730                                                                  | 58                                    | 0.2                                                                                                |
| Japan        | 37                                            | 338                                                         | 65                               | 1.3                                                    | 34,010                                  | 4,326                                         | -1.3                                                           | 9                                                             | 4,100                                                                | 64                                    | 1.5                                                                                                |
| Malaysia     | 32                                            | 75                                                          | 64                               | 2.8                                                    | 4,164                                   | 103                                           | -1.1                                                           | 3                                                             | 2,170                                                                | 59                                    | 0.2                                                                                                |
| Mexico       | 195                                           | 52                                                          | 76                               | 2.4                                                    | 6,121                                   | 626                                           | -1.2                                                           | 15                                                            | 1,530                                                                | 29                                    | 0.4                                                                                                |
| Nigeria      | 92                                            | 147                                                         | 47                               | 5.1                                                    | 370                                     | 50                                            | -2.4                                                           | 0                                                             | 740                                                                  | 15                                    | 0.2                                                                                                |
| Pakistan     | 79                                            | 187                                                         | 34                               | 4.5                                                    | 464                                     | 69                                            | 1.5                                                            | 1                                                             | 460                                                                  | 3                                     | 0.3                                                                                                |
| Philippines  | 30                                            | 272                                                         | 61                               | 3.2                                                    | 989                                     | 81                                            | -1.1                                                           | 1                                                             | 540                                                                  | 19                                    | 0.3                                                                                                |
| Russia       | 1,707                                         | 8                                                           | 73                               | 1.3                                                    | 3,022                                   | 434                                           | No Data                                                        | 3                                                             | 4,290                                                                | 50                                    | 0.4                                                                                                |
| Thailand     | 51                                            | 121                                                         | 32                               | 1.8                                                    | 2,309                                   | 143                                           | -0.7                                                           | 1                                                             | 1,240                                                                | 29                                    | 0.5                                                                                                |
| USA          | 963                                           | 30                                                          | 80                               | 2.1                                                    | 37,388                                  | 10,882                                        | -0.5                                                           | 40                                                            | 8,000                                                                | 25                                    | 1.3                                                                                                |
| Vietnam      | 33                                            | 245                                                         | 26                               | 1.9                                                    | 482                                     | 39                                            | -1.1                                                           | 1                                                             | 500                                                                  | 30                                    | 0.6                                                                                                |
| <b>World</b> | <b>13,377</b>                                 | <b>47</b>                                                   | <b>48</b>                        | <b>3.0</b>                                             | <b>5,797</b>                            | <b>36,356</b>                                 | <b>-0.6</b>                                                    | <b>631</b>                                                    | <b>1,690</b>                                                         | <b>30</b>                             | <b>0.6</b>                                                                                         |

\* The most populous countries in the world with at least 100 million people each, plus the four next most populous countries (Malaysia, Philippines, Thailand, Vietnam) in Southeast Asia.
