# Supplementary material for: China's environment in a globalizing world
Source: Springer Nature journal article supplement (doi:10.1038/4351179a), 2005-06-29
Supplement: 41586_2005_BF4351179a_MOESM14_ESM.pdf [file 41586_2005_BF4351179a_MOESM14_ESM.pdf]

Liu and Diamond: China's Environment in a Globalizing World

**Supplementary References**

1. The World Bank. *World Development Indicators 2001* (The World Bank, Washington, D.C., 2001).
2. State Council. National Program for Protecting Ecological Environment. in *Building a New Line of Defence for National Ecological Security in the 21st Century (in Chinese)* (ed. Department of Nature Conservancy (State Environmental Protection Administration)) 2-15 (China Environmental Science Press, Beijing, China, 2001).
3. State Environmental Protection Administration of China. Report On the State of Atmospheric Environment In China of 2002. [http://www.vecc-sepa.org.cn/eng/news/news\\_detail.jsp?newsid=00782](http://www.vecc-sepa.org.cn/eng/news/news_detail.jsp?newsid=00782) (2004).
4. Sun, B. & Chang, Z. in *Environment and Sustainable Development: 2000 Paper Collection of the Sino-Japan Friendship Centre for Environmental Protection* (ed. Zhang, K.) 729-732 (Meteorological Press, Beijing, China, 2001).
5. McElroy, M. B., Nielson, C. P. & Lydon, P. (eds.) *Energizing China: Reconciling Environmental Protection and Economic Growth* (Harvard University Press, Newton, 1998).
6. Polakovic, G. Pollution-packed haze drifting from China. in *Star Tribune (based on an article published in Los Angeles Times)* A4 -- April 26 (2002).
7. Zhu, R. in *Proceedings of the Fourth Meeting of the China Council for International Cooperation on Environment and Development (in Chinese)* (ed. China Council for International Cooperation on Environment and Development and State Environmental Protection Administration of China)(Huawen Press, Beijing, China, 2001).
8. Watson, R. & Pauly, D. Systematic distortions in world fisheries catch trends. *Nature* **414**, 534-536 (2001).
9. Liu, S. [http://zqb.cyol.com/gb/zqb/2004-09/03/content\\_942915.htm](http://zqb.cyol.com/gb/zqb/2004-09/03/content_942915.htm) (2004).
10. Wan, L. in *Selection of Important Documents on Environmental Protection in the New Era*. (eds. State Environmental Protection Administration of China & Document Department of the Communist Party of China) 40-43 (Central Document Press and China Environmental Science Press, Beijing, China, 2001).
11. National Bureau of Statistics of China. *China Statistical Yearbook (2001, in Chinese)* (Beijing, 2002).
12. Anonymous. <http://www.10thnpc.org.cn/english/shuzi-en/en-shuzi/gq/htm/biao/p36.htm> (2002).
13. People's Daily. [http://fpeng.peopledaily.com.cn/200006/16/print20000616\\_43221.html](http://fpeng.peopledaily.com.cn/200006/16/print20000616_43221.html) (2000).
14. FAO. <http://apps.fao.org/default.htm> (2003).
15. FAO. <http://apps.fao.org/lim500/wrap.pl?FoodBalanceSheet&Domain=FoodBalanceSheet&Language=english> (2001).
16. China Daily. <http://www.china.org.cn/english/5193.htm> (2000).

17. Smith, R. Creative Destruction: Capitalist Development and China's Environment. *New Left Review* **222**, 3-41 (1997).
18. Energy Information Administration. China: Environmental Issues. (U.S. Department of Energy)(2003).
19. Far East Energy. <http://www.fareastenergy.com/news/11.12.03.html> (2003).
20. Anonymous. <http://www.hydrocarbons-technology.com/projects/guangdong/> (2004).
21. Riskin, C. *Decentralization in China's transition (Bratislava Policy Papers #4)* (Columbia University, New York, 2000).
22. United Nations Industrial Development Organization. <http://www.unido.org/en/doc/4536> (2004).
23. Anonymous. <http://www.greennature.com/article358.html> (1998).
24. Shapiro, J. *Mao's War Against Nature* (Cambridge University Press, Cambridge, 2001).
25. United Nations Country Team in China. <http://www.undp.org/mdg/chinaMDG.pdf> (2004).
26. National Environmental Protection Agency of China. <http://www.sepa.gov.cn/eic/649644246248194048/index.shtml> (2004).
27. Smil, V. *The Bad Earth* (M.E. Sharpe, Inc., Armonk, New York, 1984).
28. Editorial Board. *Twenty Years of Administration for China's Environmental Protection (in Chinese)* (China Environmental Science Press, Beijing, China, 1994).
29. Williams, M. *Deforesting the Earth* (University of Chicago Press, Chicago, 2003).
30. Elvin, M. *The Retreat of the Elephants: An Environmental History of China* (Yale University Press, New Haven, 2004).
31. Global Leaders for Tomorrow Environment Task Force (World Economic Forum), Yale Center for Environmental Law and Policy & Center for International Earth Science Information Network (Columbia University). <http://www.ciesin.columbia.edu/indicators/ESI/rank.html> (2002).
32. Anonymous. Mud flows. *New Internationalist* (<http://www.newint.org/issue170/briefly.htm>) (1987).
33. State Environmental Protection Administration of China. Report on National Ecological and Environmental Conditions (*in Chinese*) (Beijing, 2003).
34. Anonymous. [http://fpeng.peopledaily.com.cn/200106/05/eng20010605\\_71806.html](http://fpeng.peopledaily.com.cn/200106/05/eng20010605_71806.html) (2001).
35. FAO. *Forest Resources Assessment 1990 : Global Synthesis*. (FAO, Rome, 1995).
36. Anonymous. *People's Republic of China National Report on Sustainable Development (in Chinese)* (China Environmental Science Press, Beijing, China, 2002).
37. Yamane, M. China's Recent Forest-related Policies: Overview and Background. *Policy Trend Report*, 1-12 (2001).
38. Yin, Y. [http://www.ep.net.cn/cgi-bin/ut/topic\\_show.cgi?id=16350](http://www.ep.net.cn/cgi-bin/ut/topic_show.cgi?id=16350) (2004).
39. State Environmental Protection Administration of China. <http://www.sepa.gov.cn/eic/650778946543026176/20040625/1052173.shtml> (2003).

40. Bai, B. [http://www.ep.net.cn/cgi-bin/ut/topic\\_show.cgi?id=16290](http://www.ep.net.cn/cgi-bin/ut/topic_show.cgi?id=16290) (2004).
41. Xinhua News Agency. <http://www.china.org.cn/english/2001/Jun/15077.htm> (2001).
42. Anonymous. <http://www.eia.doe.gov/cabs/china.html> (2003).
43. Xinhua News Agency. <http://www.china.org.cn/english/2004/Feb/85906.htm> (2004).
44. Compilation Group. *China's Biodiversity: A Country Study (in Chinese)* (China Environmental Science Press, Beijing, 1998).
45. Editing Group (ed.) *Action Plan for Biodiversity Conservation in China (in Chinese)* (China Environmental Science Press, Beijing, China, 1994).
46. Huang, H. et al. Conserving Native Plants in China. *Science* **297**, 935-936 (2002).
47. China Agricultural University (Office of International Relations). <http://www.cau.edu.cn/cie/en/show.php?id=38> (2004).
48. Jiang, J. <http://www.people.com.cn/GB/shizheng/1026/2987018.html> (2004).
49. Xinhua News Agency. [http://english.people.com.cn/200405/22/eng20040522\\_144062.html](http://english.people.com.cn/200405/22/eng20040522_144062.html) (2004).
50. Bezlova, A. <http://www.usatoday.com/weather/news/2002/2002-03-25-asian-sandstorm.htm> (2002).
51. Anonymous. [http://english.peopledaily.com.cn/200211/22/eng20021122\\_107269.shtml](http://english.peopledaily.com.cn/200211/22/eng20021122_107269.shtml) (2002).
52. Anonymous. <http://www7.chinesenewsnet.com/gb/MainNews/SinoNews/Mainland> (2004).
53. Zhang, J. et al. Effects of air pollution on respiratory health of adults in three Chinese cities. *Archives of Environmental Health* (1999).
54. OECD Observer. <http://www.oecdobserver.org/news/fullstory.php/aid/1037/China Ahead in Foreign Direct Investment.html> (2003).
55. Panayotou, T. (Center for International Development at Harvard University, Cambridge, Mass, 2000).
56. World Bank. [http://www.worldbank.org.cn/English/Projects/projects\\_all\\_dept.asp](http://www.worldbank.org.cn/English/Projects/projects_all_dept.asp) (2004).
57. Xinhuanet. <http://www.chinaenvironment.com/english/channel/webnews/shownews.asp?id=4E7A4BA0-5D40-4821-A86F-D0DD6EF02C30> (2002).
58. Environmental Protection Department (The Government of the Hong Kong SAR). [http://www.epd.gov.hk/epd/english/environmentinhk/waste/guide-ref/stat\\_wt.html](http://www.epd.gov.hk/epd/english/environmentinhk/waste/guide-ref/stat_wt.html) (2003).
59. National Environmental Protection Agency of China. <http://www.sepa.gov.cn/eic/649647553373011968/20021117/1035365.shtml> (1996).
60. Zweig, D. *Internationalizing China: Domestic Interests and Global Linkages* (Cornell University Press, Ithaca, NY, 2002).
61. Anonymous. [http://www.aphis.usda.gov/lpa/pubs/fsheet\\_faq\\_notice/fs\\_phalb.html](http://www.aphis.usda.gov/lpa/pubs/fsheet_faq_notice/fs_phalb.html) (2002).

62. Kwon, H.-J., Cho, S.-H., Chun, Y., Lagarde, F. & Pershagen, G. Effects of the Asian Dust Events on Daily Mortality in Seoul, Korea. *Environmental Research Section A* **90**, 1-5 (2002).
63. Qu, X. <http://www.cenews.com.cn/english/2003-02-24/226.php> (2003).
64. Xinhua News Agency. China to Import More Timber This Year. (2000).
65. Anonymous. China's timber import figures. *The Ecologist* **31**, 9 (2001).
66. Ye, R. & Runnalls, D. China enters WTO: Challenge of trade and sustainable development (in Chinese). *World Environment (in Chinese)*, 16-18 (2002).
67. United Nations Population Division. (New York, 2001).
68. Qin, D., Zhang, K. & Niu, W. (eds.) *China's Population, Resources, Environment, and Sustainable Development (in Chinese)* (Xinhua Press, Beijing, China, 2002).
69. Marginson, S.  
[http://www.bc.edu/bc\\_org/avp/soe/cihe/newsletter/News25/text012.htm](http://www.bc.edu/bc_org/avp/soe/cihe/newsletter/News25/text012.htm) (2001).
70. Edmonds, R. L. The Environment in the People's Republic of China 50 Years On. *China Quarterly* **159**, 640-649 (1999).
71. Liu, J. Effects of damming on biodiversity (in Chinese). *Modern China Studies* **3**, 124-130 (1997).
72. Zhang, J. et al. Human impacts on the large world rivers: Would the Changjiang (Yangtze River) be an illustration? *Global Biogeochemical Cycles* **13**, 1099-1105 (1999).
73. Page, J. <http://www.planetark.org/dailynewsstory.cfm?newsid=9560> (2001).
74. Anonymous. <http://cnd-f.cnd.org/HXWZExpress/02/11/021130-3.gb.html> (2002).
75. Li, H. M., Waley, P. & Rees, P. Reservoir resettlement in China: past experience and the Three Gorges Dam. *Geographical Journal* **167**, 195-212 (2001).
76. Edmonds, R. L. The Sanxia (3 Gorges) project -- The environmental argument surrounding China super dam. *Global Ecology and Biogeography Letters* **2**, 105-125 (1992).
77. Anonymous.  
[http://english.peopledaily.com.cn/200212/27/eng20021227\\_109168.shtml](http://english.peopledaily.com.cn/200212/27/eng20021227_109168.shtml) (2002).
78. Anonymous. <http://www.china.org.cn/e-xibu/1aNew/indexban.html> (2002).
79. Anonymous.  
[http://fpeng.peopledaily.com.cn/200009/16/eng20000916\\_50629.html](http://fpeng.peopledaily.com.cn/200009/16/eng20000916_50629.html) (2000).
80. International Institute for Environment and Development & World Business Council for Sustainable Development. *Breaking New Ground : Mining, Minerals, and Sustainable Development* ( Earthscan Publications, London, 2002).
81. Administrative Center for China's Agenda 21. <http://www.acca21.org.cn/> (2004).
82. State Environmental Protection Administration of China, State Development Planning Commission of China, State Economic Trade Commission of China & Ministry of Finance of China. *The Tenth Five-Year Plan for Environmental Protection in China (in Chinese)* (China Environmental Science Press, Beijing, China, 2002).
83. Anonymous. <http://www.acca21.org.cn/wssd/zrj.html> (2002).
84. Liu, J. in *Ecology and Socio-economic Development (in Chinese)* (eds. Sun, R., Lin, T., Xiang, Y., Wang, R. & Liu, J.) 192-217 (Hunan Science and Technology Press, Changsha, 1989).

85. United States Energy Information Administration.  
<http://www.eia.doe.gov/emeu/cabs/chinaenv.html> (2001).
86. State Council. <http://www.forestry.gov.cn/DB/zcfg/slss.asp?id=58> (2002).
87. State Environmental Protection Administration of China.  
<http://www.sepa.gov.cn/eic/649094490434306048/20040901/1288.shtml> (2004).
88. WWF, UNEP-WCMC & Global Footprint Network.  
<http://www.panda.org/downloads/general/lpr2004.pdf> (2004).
89. Xie, Z.  
<http://www.zhb.gov.cn/eic/649096689457561600/20040629/1052263.shtml>  
(2004).
90. People's Daily.  
[http://english.peopledaily.com.cn/200303/14/print20030314\\_113322.html](http://english.peopledaily.com.cn/200303/14/print20030314_113322.html) (2003).
91. Anonymous.  
[http://english.peopledaily.com.cn/200403/12/eng20040312\\_137357.shtml](http://english.peopledaily.com.cn/200403/12/eng20040312_137357.shtml) (2004).
92. Sims, H. One-fifth of the Sky: China's Environmental Stewardship. *World Development* **27**, 1227-1243 (1999).
93. Yang, J. & Ge, C. (eds.) *Environment al Taxes: Recent Developments in China and OECD Countries (in Chinese)* (China Environmental Science Press, Beijing, China, 2000).
94. Yu, D. (ed.) *Market Economy and Environmental Protection (in Chinese)* (Chemical Industry Press, Beijing, China, 2001).
95. Daily, G. (ed.) *Nature's Services* (Island Press, Washington, D.C., 1997).
96. New Agriculturist. <http://www.new-agri.co.uk/04-4/focuson/focuson1.html>  
(2004).
97. United Nations Population Division.  
[http://www.un.org/esa/population/publications/wup2003/2003urban\\_rural.htm](http://www.un.org/esa/population/publications/wup2003/2003urban_rural.htm)  
(2004).
98. World Bank. <http://devdata.worldbank.org/data-query> (2004).
99. United Nations FAO. <http://www.fao.org/forestry/foris/webview/forestry2> (2003).
100. Venetoulis, J., Chazan, D. & Gaudet, C.  
<http://www.redefiningprogress.org/publications/footprintnations2004.pdf> (2004).
101. NationMaster.com. <http://www.nationmaster.com/cat/Environment> (2003-2004).
102. Sea Around Us Project. <http://searounds.org/eez/eez.aspx> (2004).
103. Sigerson, J. (EIRNS, 2001).
104. Editing Group. *China's Natural Geography Maps (2nd edition, in Chinese)* (China Map Press, Beijing, 1998).
105. China Data Center (University of Michigan).  
<http://Chinadatacenter.org/chinageography/> (2004).
106. China Daily. [http://en-1.ce.cn/National/Government/200409/04/t20040904\\_1673125.shtml](http://en-1.ce.cn/National/Government/200409/04/t20040904_1673125.shtml) (2004).
107. National Bureau of Statistics of China. *China Statistical Yearbook (1999, in Chinese)* (Beijing, 2000).
108. World Bank. [www.worldbank.com/data/databytopic/POP.pfd](http://www.worldbank.com/data/databytopic/POP.pfd) (2004).
109. Information Office of the State Council of the People's Republic of China.  
<http://www.china.org.cn/e-white/20040907/9.htm> (2004).
110. CIA. <http://www.cia.gov/cia/publications/factbook/geos/ch.html> (2004).

111. china.org.cn. <http://www.china.org.cn/features/China2004/106915.htm> (2002-2003).
112. National Bureau of Statistics of China. *China Statistical Yearbook (2001, in Chinese)* (Beijing, 2002).
113. Lawrence Berkeley National Laboratory. (Lawrence Berkeley National Laboratory, 2004).
114. State Environmental Protection Administration of China. <http://www.sepa.gov.cn/eic/649368303189360640/index.shtml> (2004).
115. State Environmental Protection Administration of China. <http://www.sepa.gov.cn/eic/649368273124589568/index.shtml> (2002).
116. State Environmental Protection Administration of China. <http://www.sepa.gov.cn/eic/649368298894393344/index.shtml> (2003).
117. Beijing Portal. [www.beijingportal.com.cn/7838/2004/03/12/1380@1936721.htm](http://www.beijingportal.com.cn/7838/2004/03/12/1380@1936721.htm) (2004).
118. USDA Foreign Agriculture Service. <http://www.fas.usda.gov/gainfiles/200406/146106598.pdf> (USDA, Washington, D.C., 2004).
119. State Oceanic Administration of China. [www.soa.gov.cn/chichao](http://www.soa.gov.cn/chichao) (2004).
